# Supplementary material for: Highly sensitive electrochemical immunoassay for H1N1 influenza virus based on copper-mediated amplification
Source: Royal Society of Chemistry journal article supplement (doi:10.1039/c2cc31990j), 2012-01-01
Supplement: c2cc31990j.pdf [file c2cc31990j.pdf]

## Supporting Information

1  
2  
3  
4  
5  
6  
7  
8  
9  
10  
11  
12  
13  
14  
15  
16  
17  
18  
19  
20  
21  
22

### Experimental

#### Chemicals and reagents

Phosphate buffered saline (PBS, 0.01 M, pH 7.4), 96-wells high binding ELISA plates, bovine serum albumin(BSA), Copper acetate, acetic acid, dried ethanol, Hydrochloric acid were purchased from Shanghai Sangon Biological and Technological Service Co., Ltd. . Unless otherwise stated, all the reagents used in this study were at least of analytical grade. All solutions were prepared with deionized water with conductivity of  $18.2 \text{ M}\Omega \text{ cm}^{-1}$  from a water purification system (Millipore).

Rabbit monoclonal anti-H1N1, hemagglutinin (HA) (OTWO Guangzhou PL labs), Rabbit polyclonal anti-H1N1, hemagglutinin (HA) 1 (Beijing Bioss Biological and Technological Co., Ltd. ), Inactivated H1N1 Influenza A Virus (Solomon Islands/03/06 ) (prospec) was provided from Shanghai kenqiang instrument Co., Ltd. H5N1, H3N2, NCD virus were kindly provided by Fujian Center for Disease Control & Prevention.

#### Apparatus.

The electrochemical measurements were performed with a CHI 660D electrochemical workstation (Shanghai, China). A conventional three-electrode system was used comprising a self Assembled Monolayer (SAM) glass carbon electrode(GCE) as working electrode, a platinum wire as auxiliary electrode, and a saturated calomel

23 reference electrode were employed. All potentials in this paper are quoted with respect  
24 to the saturated calomel reference electrode (SCE). All electrochemical experiments  
25 were performed under a dry nitrogen atmosphere at room temperature.

#### 26 **Preparation of Stable Copper Oxide Nanoparticle**

27 The synthetic method was slightly modified according to the literature [1]. Briefly,  
28 1 mmol of  $\text{Cu}(\text{CH}_3\text{COO})_2$  and 2 mmol of acetic acid, were respectively dissolved in  
29 50 mL of dried ethanol, and the solution was heated to the boiling temperature of  
30  $78\text{ }^\circ\text{C}$ . 4 mmol of the NaOH powder were then added to the solution under vigorous  
31 stirring. The reactions were performed for 1 h. The CuO NPs were obtained by  
32 centrifugation at 4000 rpm and washed several times with acetic acid and deionized  
33 water, then dried at  $60\text{ }^\circ\text{C}$ .

#### 34 **Preparation of CuO NPs Antibody Conjugates**

35 1 mg of CuO NPs was dispersed into 1 mL of phosphate buffer saline (0.01 M  
36 PBS). Followed by ultrasonication for 5 min, 50  $\mu\text{L}$  polyclonal antibody (the original  
37 concentration of secondary antibody is 1.0mg/ml, diluted to 1:10) was added in the  
38 CuO NPs solution, then the mixture was slightly vortexed for 3 h, and centrifuged for  
39 5 min at 5000 rpm. The solution was disposed in the upper layer which contained  
40 unlabelled secondary antibody, and washed three times with PBS. After centrifugation,  
41 the precipitate of CuO NPs antibody conjugates was redispersed with 200  $\mu\text{L}$  0.1%  
42 BSA. Repeated the above operation, the CuO NPs labeled polyclonal antibody (in 1  
43 mL 0.01 M PBS) thus obtained was stored at  $4\text{ }^\circ\text{C}$ .

#### 44 **Immunoassay performing**

45 The assay was performed in a polystyrene 96-wells high binding ELISA plate. The  
46 schematic diagram of the sandwich immunoassay and copper amplification for  
47 influenza virus H1N1 with CuO-NP tags was shown in Fig. 1. Initially, 50  $\mu\text{L}$  of 10  
48  $\mu\text{g}/\text{mL}$  monoclonal HA antibodies in 0.01 M PBS buffer was steadily attached on the  
49 solid substrate via physical adsorption between hydrophobic groups of antibody  
50 molecule and polystyrene. The glass slide was washed off three times with 100  $\mu\text{L}$  of  
51 washing buffer to remove unbound antibodies, and the uncoated active sites of  
52 polystyrene substrate were saturated with 30  $\mu\text{L}$  of blocking buffer, in which 0.1%  
53 BSA in PBS was used as a blocking agent to prevent nonspecific adsorption of the  
54 antigens. 80  $\mu\text{L}$  of diluted H1N1 standard solutions (in PBS buffer) was then  
55 incubated for 1 h at 37  $^{\circ}\text{C}$ . The wells were washed three times with PBS to remove  
56 the unbound antigens. 40  $\mu\text{L}$  of CuO NPs labeled polyclonal antibody was incubated  
57 over the well to allow the formation of sandwich complexes in the microplate.  
58 Unbound copper conjugates were removed from the glass slide with 100  $\mu\text{L}$  of PBST  
59 (PBS including 0.1% Tween 20) and 100  $\mu\text{L}$  of pure water respectively. The copper  
60 conjugates were released into the solution with 20  $\mu\text{L}$  of 0.1 M HCl for 5 min, and the  
61 electrochemical detection was then performed. The control experiments of only BSA  
62 coated CuO and bare CuO NPs were prepared in the same way when the  
63 concentration of H1N1 was 5 ng/mL.

64

### 65 **Electrochemical detection**

66 Before modification, the GCE was polished successively with 0.3, 0.05  $\mu\text{m}$  alumina  
67 slurries followed by thorough rinsing with double distilled water, then sonicated in  
68 ethanol and double distilled water for 3 min, respectively. Finally, the GCE was dried  
69 under the stream of high purity nitrogen. 5 $\mu\text{L}$  of the above mentioned copper ions  
70 solutions was deposited on the fresh prepared GCE surface until the solvent was  
71 evaporated.

72 CV and SLV measurements were performed in the 0.01 M nitrogen-saturated HCl  
73 with 1 M NaCl by scanning from -0.60 to +0.60 V. The peak current related to the  
74  $\text{Cu}^{2+}$  at about -0.15 V was taken as the electrochemical measurement signal.

75

## 76 **References**

77 [1] T. Kida, T. Oka, M. Nagano. *J .Am. Ceram. Soc.* **2007,90 (1):** 107–110.

78

79

80

81

82

83

84

85

86

87

88

89

90

91

92

93

94

95 **Fig. S1**

96

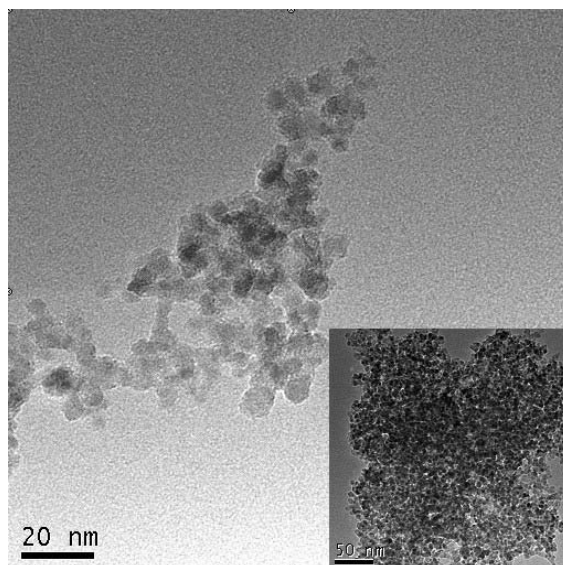

97

98

99 **Fig. S1 Transmission electronic microscopy (TEM) image of the synthesised CuO**

100 **NPs by HRTEM (Tecnai G2 F20 S-TWIN 200KV)**

101

102

103

104

105

106

107

108

109

110

111

112 **Fig. S2**

113

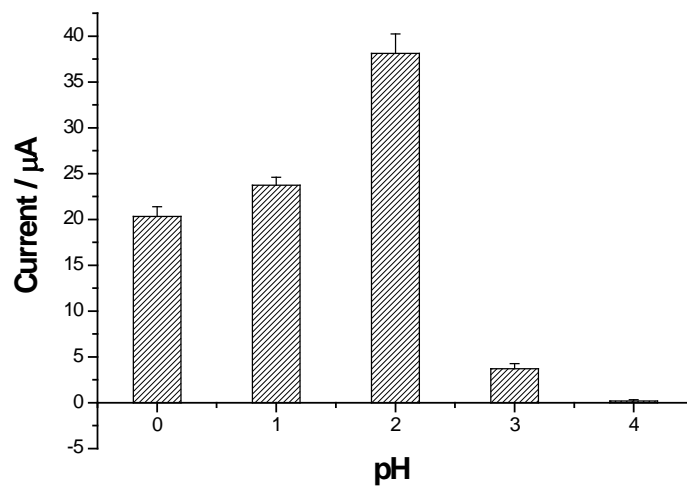

114

115 **Fig. S2** Effect of pH on the oxidation peak currents by linear sweep voltammetry in  
116 different pH supporting electrolytes with 0.1mM  $\text{Cu}^{2+}$  modified GC electrodes,  
117 supporting electrolytes: Different pH with HCl in 1M NaCl, scan rate:100mV/s.

118

119

120

121

122

123

124

125

126

127

128 **Fig. S3**

129

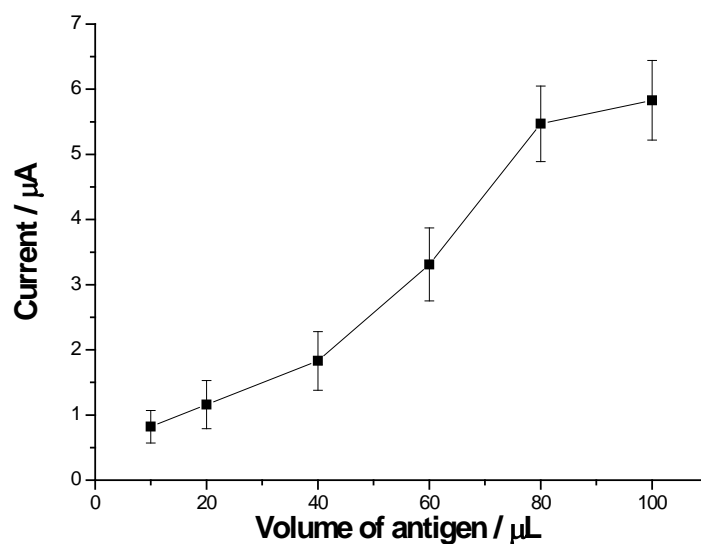

130

131 **Fig. S3** Relationship between the volume of antigen and electrochemical signal

132 Concentration of H1N1: 5ng/mL; 500ng monoclonal and polyclone antibody in each

133 well; The antigen-antibody immunoreaction : 60 min at 37 °C .

134

135

136

137

138

139

140

141

142

143

144 **Fig. S4**

145

146

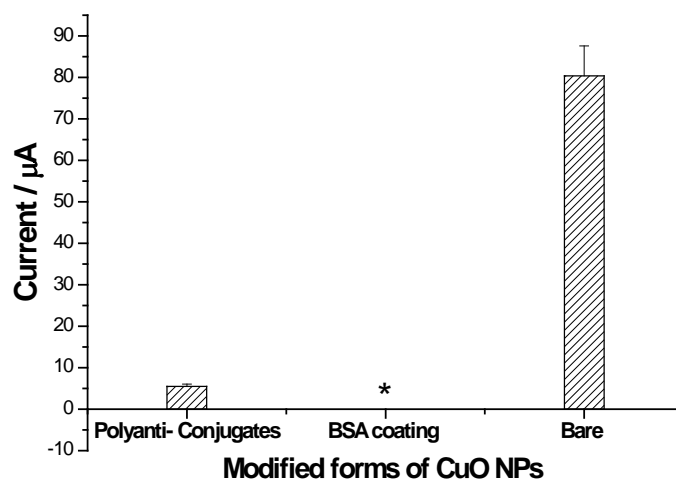

147

148 **Fig. S4 Relationship between modified forms of CuO NPs and electrochemical signal.**

149 Concentration of H1N1: 5ng/mL; 500ng monoclonal antibody in each well; The

150 antigen-antibody immunoreaction : 60 min at 37 °C. \*: Not detected.

151

152
